# Supplementary material
Source: Springer Nature journal article supplement (https://www.springermedizin.de/resource/supplementary/12916_2010_278_MOESM10_ESM.pdf/9599552)

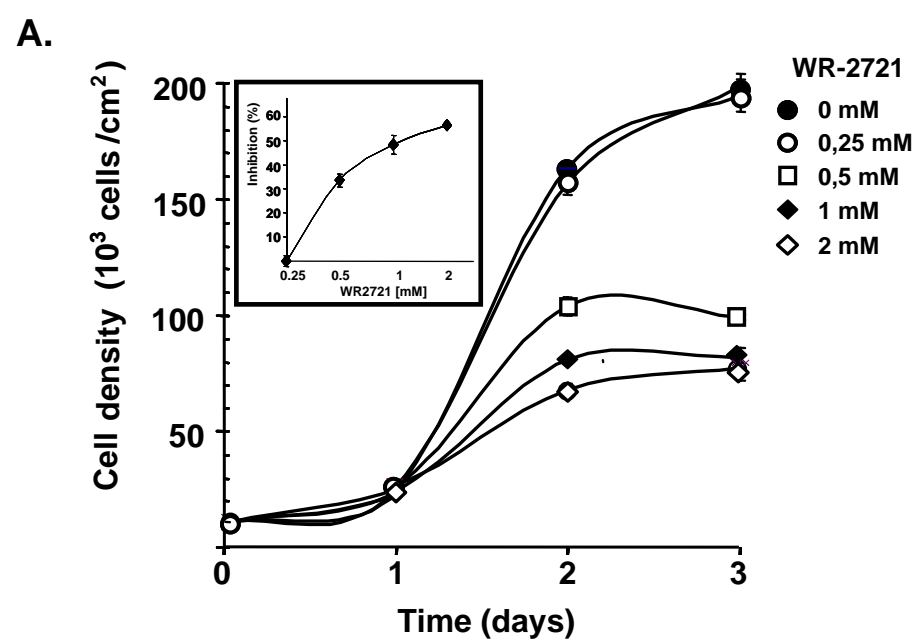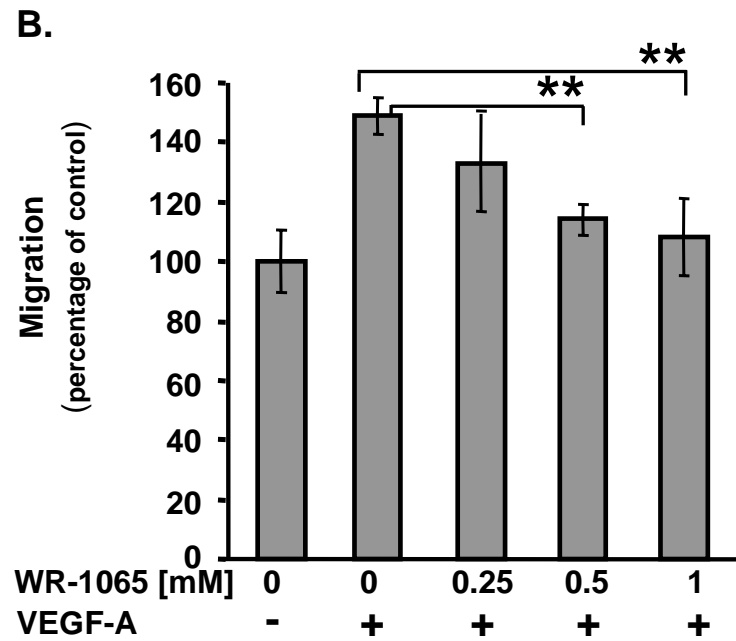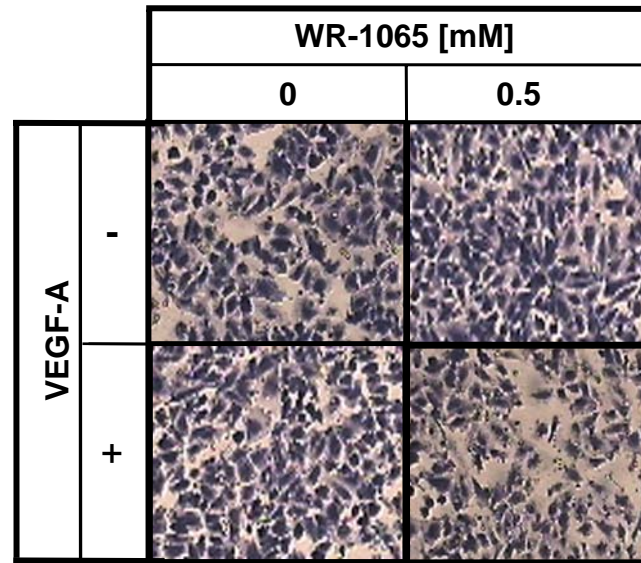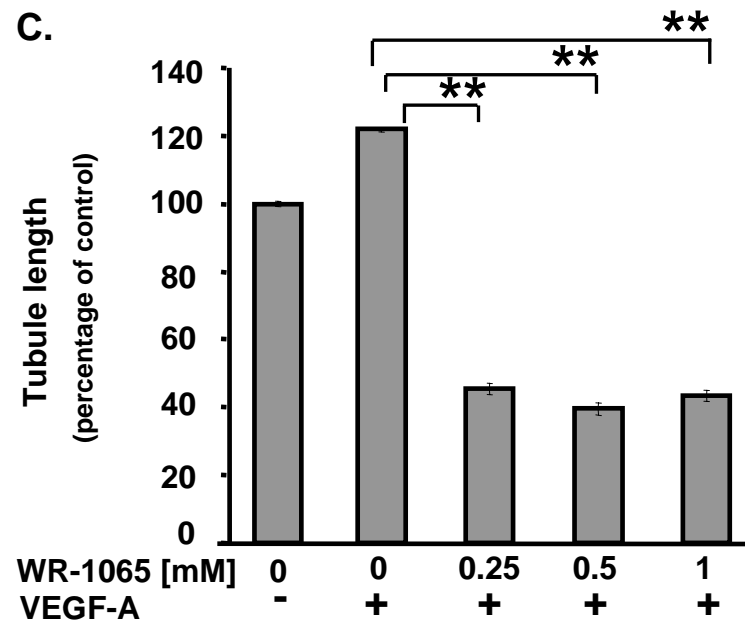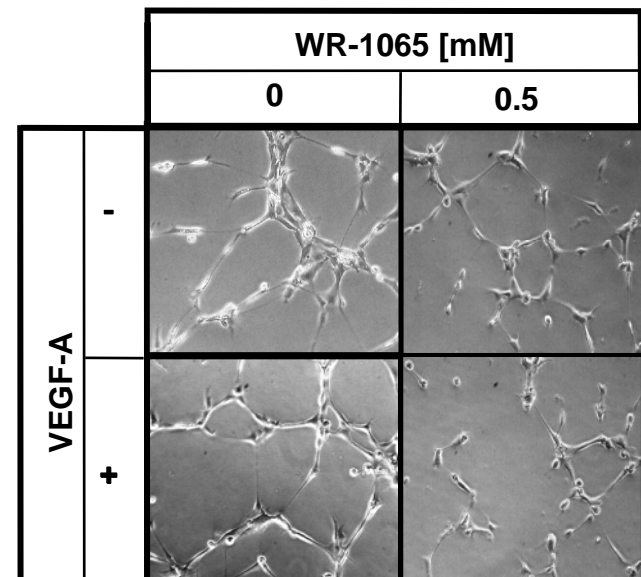

Supplement: MOESM10 [file 9599552]
